# Supplementary material for: Association between the COVID-19 Vaccine and Preventive Behaviors: Panel Data Analysis from Japan
Source: MDPI journal article supplement (doi:10.3390/vaccines11040810), 2023-04-06

## Questionnaire on the Novel Coronavirus

This survey aims to clarify how you perceive the threat of the novel coronavirus and prevent it, and use the obtained knowledge to cope with the occurrence of similar event in the future. To this aim, we also ask your attributes, preferences, and opinions in the questionnaire. Your responses will be used only for academic purpose. Thank you very much for your cooperation.

QA1. To what degree are you currently feeling happiness? On a scale of 0-10 where “10” is “very happy” and “0” is “very unhappy,” how do you rate your current level of happiness? (**X ONE Box**)

Very Unhappy      ←————→      Very Happy

0 ☐ 1 ☐ 2 ☐ 4 ☐ 5 ☐ 6 ☐ 7 ☐ 8 ☐ 9 ☐ 10 ☐

QA2. In the last two weeks, how much of the following items have you achieved? Please indicate from 1(I have not achieved at all) to 5 (I have completely achieved).

1. Not going out of home ..... 1    2    3    4    5
2. Not going to a working place or school ..... 1    2    3    4    5
3. Wearing a mask ..... 1    2    3    4    5
4. Washing hands with great care ..... 1    2    3    4    5
5. Cancelling scheduled trips and stopping participation in an event ..... 1    2    3    4    5

QA3. In the last two weeks, how much have you felt the emotion of anger, fear, and anxiety? Please indicate from 1 (I have not felt the emotion the slightest bit during the last week) to 5 (I have felt the emotion more strongly than ever during the last week).

Anger ..... 1    2    3    4    5  
Fear ..... 1    2    3    4    5  
Anxiety ..... 1    2    3    4    5

QA4. In the last two weeks, have any infected people been detected in the places specified below?

- 1 Your neighbor ..... Yes    No    don't know
- 2 Your relatives and friends ..... Yes    No    don't know
- 3 Your working place and school ..... Yes    No    don't know
- 4 The Municipality where you live ..... Yes    No    don't know
- 5 The Prefecture where you live ..... Yes    No    don't know

QA5. **Assume that** a vaccine, which is verified to be effective against novel coronavirus is available at the cost of 100 thousand yen (the cost is not covered by insurance)? Would you take it after paying 100 thousand yen? If you definitely do not take the vaccine, you would choose “1”, and if you definitely take, you would choose “5” in the scale of 1 to 5. **(X ONE Box)**

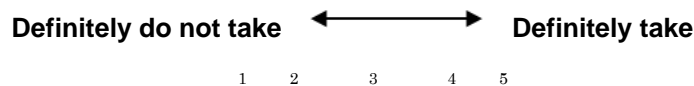

QA6. What do you expect is the probability (%) of you getting infected with the novel coronavirus within one month?

.                      %

QA7. How serious are your symptoms if you are infected with the novel coronavirus? **(X ONE Box)**

- 1    Symptoms that have little influence
- 2    A symptom that takes you about a few days to recover from
- 3    A symptom that takes you about a week to recover from
- 4    A serious symptom that could take about a month to recover from
- 5    A very serious symptom that could cause some after-effects
- 6    An extremely serious symptom that could cause death

QA8. What do you expect from the spread of infection of the novel coronavirus in Israel within one month? Please choose one of the following options and check one box.

- 1    The infection is completely converged.
- 2    The infection is heading toward convergence.
- 3    The infection does not spread more than it already has.
- 4    Though the number of deaths and infected persons increase, serious situations don't occur.
- 5    Though the infection spreads all over and deaths accumulate, paralysis of urban functions and the economy is limited.
- 6    The infection spreads all over Israel and deaths accumulate, completely paralyzing urban functions and the economy.

QA9. Do you think that the following measures taken to cope with the novel coronavirus infection in these two weeks were appropriate? Please indicate for every item from 1=too lax (or too late), strong opposition, 2=lax, slight opposition, 3=very appropriate and decisive judgement, 4= strict (or hasty, slight opposition), 5=went too far (or too hasty, strong opposition)

**Please change the items to meet the situation in Israel!**

1. Admission of overseas travelers of entrance from abroad
2. Government's request for closure of public schools.
3. Cancelling admission to Sports games
4. Staggered working hours and teleworks
5. Inspection and medical system

QA10. What do you expect from your revenue and GDP in Israel and the world, in the coming two years (2020 and 2021) in comparison with 2019? Please choose from  
1=improve by more than 4%, 2=improve between 1% to 3.99%, 3= almost unchange, 4=drop between 1 to 3.99%, 5=drop between 4 to 9.99%, 6= drop more than 10%

|                           | Coming one year (2020) | the next year (2021) |
|---------------------------|------------------------|----------------------|
| Revenue of your household |                        |                      |
| GDP of Israel             |                        |                      |
| GDP of the world          |                        |                      |

QA11. In these two weeks, have you received enough information about the Coronavirus? Please choose from 1 (definitely not enough) to 5 (definitely enough).

QA12. What do you expect the probability (%) is of cancelling the Tokyo Olympic Games in July and August 2020?

\_\_\_\_\_ %

QB1. Your gender:

1 Male      2 Female

QB2. Your age:

\_\_\_\_\_ years old

Tens   ones

QB3. Please indicate your relationship status by selecting the appropriate option.

- 1 Married (including common-law marriage)
- 2 Divorced
- 3 Widowed
- 4 Unmarried
- 5 Cohabitation

QB4. Please indicate the highest level of education completed by you and your parents. *If you are still in school, please select the number that corresponds to the degree you are pursuing right now. (X ONE Box for each column)*

**You            your father            your mother**

- 1. Grade School
- 2. High School
- 3. College – Associate’s Degree (2 years)
- 4. College – Bachelor’s Degree (4 years)
- 5. Masters Degree
- 6. Doctoral Degree

QB5. What is your current occupation? **(X ONE Box)**

- 1 Full-time worker
- 2 Part-time worker
- 3 Housewife/Househusband(unemployed)
- 4 Student
- 5 Retired (excluding housewives/househusbands)
- 6 Unemployed (excluding housewives/househusbands)
- 7 Other

**Please replace with the Israeli style question and using ILS**

**QB6.** Approximately state the earned annual income (before taxes, with bonuses) of your entire household for 2019. *(If you are a student, please select the income of your parents' entire household.) (X ONE Box)*

01 ☐ Less than \$10,000

07 ☐ \$100,000 to less than \$120,000

02 ☐ \$10,000 to less than \$20,000

08 ☐ \$120,000 to less than \$140,000

- 03 ☐ \$20,000 to less than \$40,000      09 ☐ \$140,000 to less than \$160,000
- 04 ☐ \$40,000 to less than \$60,000      10 ☐ \$160,000 to less than \$180,000
- 05 ☐ \$60,000 to less than \$80,000      11 ☐ \$180,000 to less than \$200,000
- 06 ☐ \$80,000 to less than \$100,000      12 ☐ More than \$200,000
- 13 ☐ don' t want to answer

QB7. How many people are currently living in your household?

# of people:      \_\_\_\_\_  
                                          Tens      ones

QB8. Are the following people included in your family? If yes, please check the Box.

- ☐ 1. Children going to elementary school
- ☐ 2. Children going to junior high school
- ☐ 3. Grand children going to elementary school
- ☐ 4. Grand children going to junior high school
- ☐ 5. Elderly people between 70 and 80 years
- ☐ 6. Elderly people over 80 years

QB9. In which region (state) do you live now?

Name of the region (state) in Israel: \_\_\_\_\_

QB10. Do the following statements hold true for you? Please choose from 1 (it is particularly true for you) to 5 (it doesn't hold true at all for you). Of course, you may choose any number in between as well. **(X ONE Box For EACH)**

1. I have anxiety about my health ..... 1    2    3    4    5
2. I am deeply religious.....1    2    3    4    5
3. I have undergone a periodic blood test .....1    2    3    4    5
4. In general, most people are trustworthy ..... 1    2    3    4    5
5. In uncertain times, I usually expect the best ..... 1    2    3    4    5
6. If something can go wrong for me, it will ..... 1    2    3    4    5
7. I am always optimistic about my future. ....1    2    3    4    5

QB11. Please indicate if you are affiliated with any of the following religions. **(X ONE Box)**

- 01 ☐ None
- 02 ☐ Judaism
- 03 ☐ Islam
- 04 ☐ Christian
- 05 ☐ Buddhism
- 06 ☐ Others not listed above
- 07 ☐ Prefer not to answer

**QB12.** On a scale of 0-10, “10” being the “Wealthiest” and “0” being the “Poorest”, please indicate what you think your standard of living is and what you think the standard of living was for your family when you were 15 years old. If you prefer not to answer, please check this Box.  
**(X ONE Box)**

|                |                                                                                                                                                                                                                                                                                |                                               |
|----------------|--------------------------------------------------------------------------------------------------------------------------------------------------------------------------------------------------------------------------------------------------------------------------------|-----------------------------------------------|
| <b>Poorest</b> | ←————→                                                                                                                                                                                                                                                                         | <b>Wealthiest</b>                             |
| Now            | 0 <input type="checkbox"/> 1 <input type="checkbox"/> 2 <input type="checkbox"/> 4 <input type="checkbox"/> 5 <input type="checkbox"/> 6 <input type="checkbox"/> 7 <input type="checkbox"/> 8 <input type="checkbox"/> 9 <input type="checkbox"/> 10 <input type="checkbox"/> | prefer not to answer <input type="checkbox"/> |
| 15 years old   | 0 <input type="checkbox"/> 1 <input type="checkbox"/> 2 <input type="checkbox"/> 4 <input type="checkbox"/> 5 <input type="checkbox"/> 6 <input type="checkbox"/> 7 <input type="checkbox"/> 8 <input type="checkbox"/> 9 <input type="checkbox"/> 10 <input type="checkbox"/> | prefer not to answer <input type="checkbox"/> |

**Please change into NIS**

**QB13.** Assume that you know there is a 50% chance of losing \$1000 on a given day. You can take out insurance to cover this amount in case of a loss. What is the most you would pay to purchase the insurance? **(X ONE Box)**

- 1 Do not purchase even if the price is \$0
- 2 Purchase if the price is less than or equal to \$10
- 3 Purchase if the price is less than or equal to \$50
- 4 Purchase if the price is less than or equal to \$100
- 5 Purchase if the price is less than or equal to \$150
- 6 Purchase if the price is less than or equal to \$200
- 7 Purchase if the price is less than or equal to \$300
- 8 Purchase if the price is less than or equal to \$400
- 9 Purchase if the price is less than or equal to \$500
- 10 Purchase even if the price is more than \$500

Please change into NIS

QB14. Assume that you know there is a 0.1% chance of losing \$0.5 million on a given day. You can take out insurance to cover this amount in case of a loss.

What is the most you would pay to purchase the insurance? (X ONE Box)

- 1 Do not purchase even if the price is \$0
- 2 Purchase if the price is less than or equal to \$10
- 3 Purchase if the price is less than or equal to \$50
- 4 Purchase if the price is less than or equal to \$100
- 5 Purchase if the price is less than or equal to \$200
- 6 Purchase if the price is less than or equal to \$300
- 7 Purchase if the price is less than or equal to \$500
- 8 Purchase if the price is less than or equal to \$1000
- 9 Purchase if the price is less than or equal to \$5000
- 10 Purchase if the price is less than or equal to \$10000
- 11 Purchase even if the price is more than \$10000

QB15. Now let's assume that you have the option to receive NIS300 now or receive a different amount in twelve months. *Compare the amounts and timing in Option "A" with Option "B" and indicate which amount you would prefer to receive for all 8 choices*

| Option "A"<br>Receive<br>now | Option "B"<br>Receive<br>in 12 months | <i>An<br/>Annual<br/>Interest<br/>Rate of</i> | Which ONE do you prefer?<br>(X ONE Box For EACH Row) |   |
|------------------------------|---------------------------------------|-----------------------------------------------|------------------------------------------------------|---|
| 300                          | 285                                   | -5%                                           | A                                                    | B |
| 300                          | 300                                   | 0%                                            | A                                                    | B |
| 300                          | 306                                   | 2%                                            | A                                                    | B |
| 300                          | 312                                   | 4%                                            | A                                                    | B |
| 300                          | 318                                   | 6%                                            | A                                                    | B |
| 300                          | 330                                   | 10%                                           | A                                                    | B |
| 300                          | 360                                   | 20%                                           | A                                                    | B |
| 300                          | 420                                   | 40%                                           | A                                                    | B |

**QB16.** Assuming you find a well-known charity that provided financial help to people who typically had about one-fifth of your family income per person. Up to how much of your own family income per month, would you be willing to give the charity, if you knew the charity would give twice the amount of your donation directly to benefit these people? (**X ONE Box**)

- 1      No help at all
- 2      Up to 2 % of your family income per month
- 3      Up to 5 % of your family income per month
- 4      Up to 10 % of your family income per month
- 5      Up to 20% of your family income per month
- 6      More than 20% of your family income per month

**QB17.** Usually, what is the common source of news for you. Please indicate the item most frequently used with 1, and the next item with 2.

- ☐ newspaper      ☐ news program of TV
- ☐ conversation with family and friends face to face or communications  
SNS (social networking service; including twitter)
- news in web      ☐ news through applications in smartphone

**QB18** In terms of taking risks in your day to day life, how would you classify yourself on a scale of 1–10? Please note that 1 indicates that you avoid taking any risks at all costs and 10 indicates that you engage in extremely risky and dangerous behaviors.

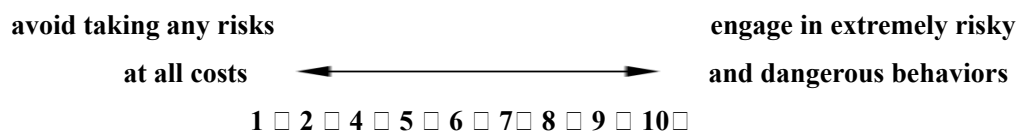

Supplement: s1 [file s1]
