# Supplementary material for: Association between the COVID-19 Vaccine and Preventive Behaviors: Panel Data Analysis from Japan
Source: MDPI journal article supplement (doi:10.3390/vaccines11040810), 2023-04-06
Supplement: s1 [file s1]

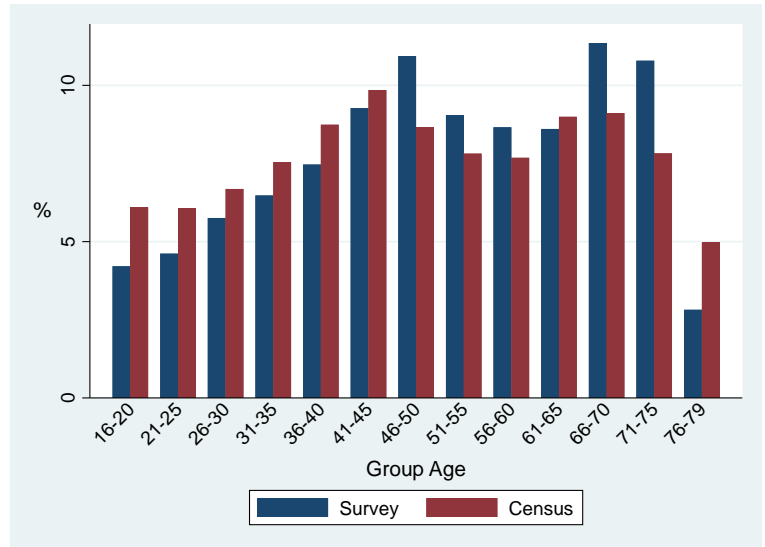

**Figure S1. Comparison of the age distribution of our survey sample with that of the 2015 Japan population census.**

Sources: Statistics Bureau, Ministry of Internal Affairs and Communications (2015). 2015 Japan Population Census.

[https://www.e-stat.go.jp/stat-](https://www.e-stat.go.jp/stat-search/files?page=1&layout=datalist&toukei=00200521&tstat=000001080615&cycle=0&tclass1=000001089055&tclass2=000001089056&result_page=1&second=1&second2=1)

[search/files?page=1&layout=datalist&toukei=00200521&tstat=000001080615&cycle=0&tclass1=000001089055&tclass2=000001089056&result\\_page=1&second=1&second2=1](https://www.e-stat.go.jp/stat-search/files?page=1&layout=datalist&toukei=00200521&tstat=000001080615&cycle=0&tclass1=000001089055&tclass2=000001089056&result_page=1&second=1&second2=1) (accessed on February 18, 2018).

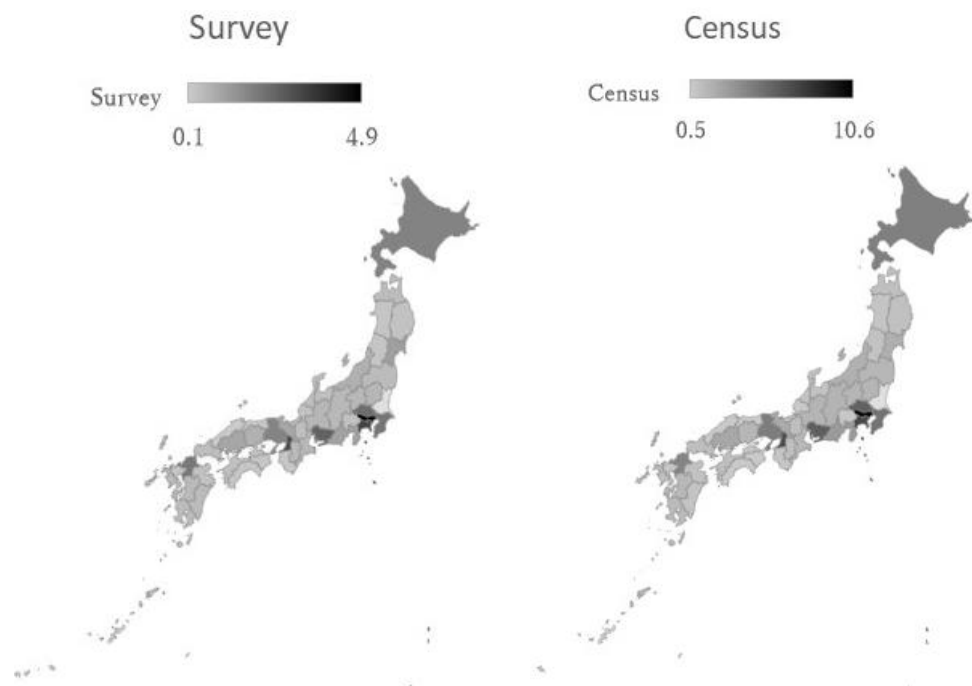

**Figure S2. Comparison of the geographical distribution of our survey sample with that of the 2015 Japan population census.**

Note: Darker shaded areas indicate more populated areas. Number in the map indicates the percentage of population in each residential prefecture.

Sources: Statistics Bureau, Ministry of Internal Affairs and Communications (2015). 2015 Japan Population Census.

<https://www.stat.go.jp/data/nihon/02.html>

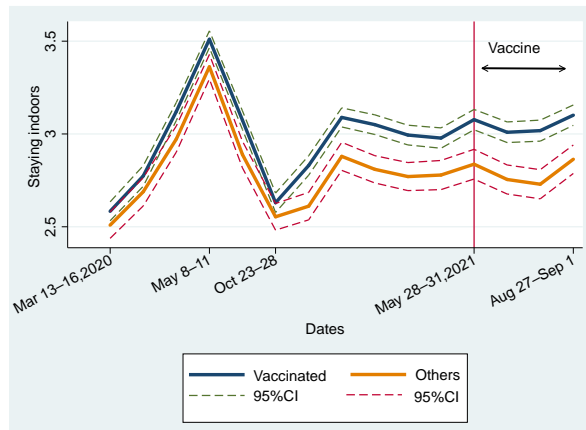

**Figure S3(a). Change in staying indoors.**

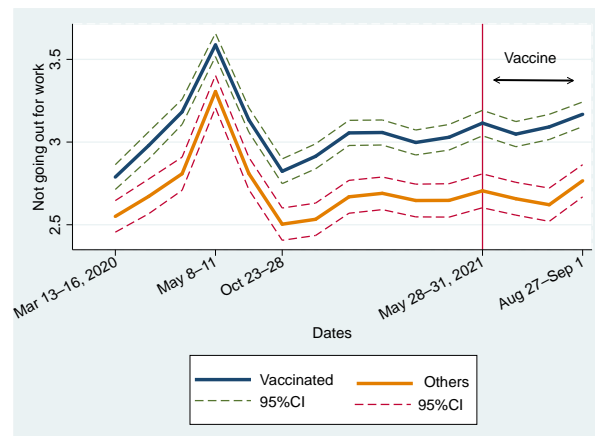

**Figure S3(b). Change in not going out for work.**

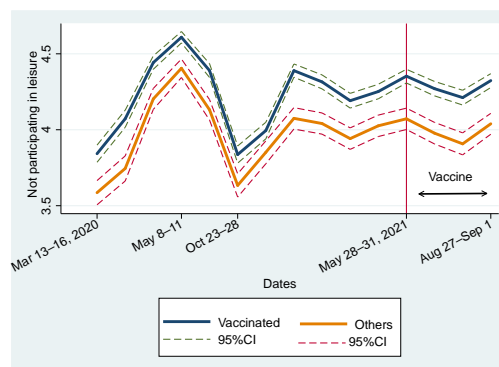

**Figure S3(c). Change in not participating in leisure activities outside home.**

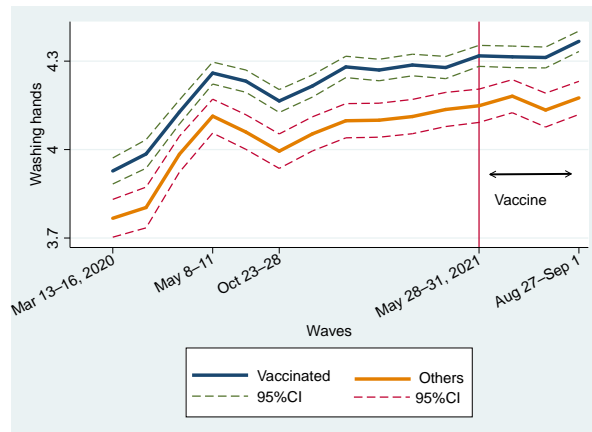

**Figure S3(d). Change in handwashing.**

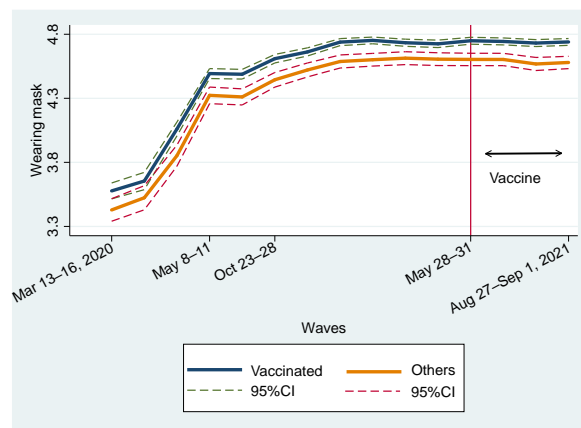

**Figure S3(e). Change in wearing mask.**
