# Supplementary material for: Association between the COVID-19 Vaccine and Preventive Behaviors: Panel Data Analysis from Japan
Source: MDPI journal article supplement (doi:10.3390/vaccines11040810), 2023-04-06
Supplement: s1 [file s1]

**Table S1. FE model. Dependent variables are preventive behaviors. Same specification of Table 6. Sample including those who stopped participating in the surveys during the studied period.**

|                             | (1)<br><i>STAYING<br/>INDOORS</i> | (2)<br><i>NOT GOING<br/>TO WORK</i> | (3)<br><i>NOT FOR<br/>LEISURE</i> | (4)<br><i>HANDWASHI<br/>NG</i> | (5)<br><i>WEARING<br/>MASK</i> |
|-----------------------------|-----------------------------------|-------------------------------------|-----------------------------------|--------------------------------|--------------------------------|
| <i>VACCINE<br/>FIRST</i>    | 0.046                             | 0.012                               | 0.018                             | 0.005                          | 0.014                          |
| <i>VACCINE<br/>SECOND_1</i> | 0.085**                           | 0.064**                             | 0.083**                           | -0.006                         | -0.010                         |
| <i>VACCINE<br/>SECOND_2</i> | 0.125**                           | 0.098***                            | 0.111**                           | 0.002                          | 0.002                          |
| <i>VACCINE<br/>SECOND_3</i> | 0.102                             | 0.043                               | 0.115                             | -0.014                         | -0.014                         |
| <i>VACCINE<br/>SECOND_4</i> | 0.020                             | 0.024                               | 0.063                             | -0.038                         | -0.038                         |
| Adj R <sup>2</sup>          | 0.55                              | 0.42                                | 0.69                              | 0.53                           | 0.65                           |
| Obs.                        | 30,120                            | 30,120                              | 30,120                            | 30,120                         | 30,120                         |

**Note:** CI is redundant information and so not reported. For convenience, the coefficient of PROBABILITY COVID-19 is multiplied by 1000. Although the effects are not reported, the model includes various control variables used in the specification of Table 6, and CI are calculated.

\*\*\*p<0.01

\*\*p<0.05

\*p<0.10
