# Supplementary material for: Association between the COVID-19 Vaccine and Preventive Behaviors: Panel Data Analysis from Japan
Source: Vaccines (Basel). 2023 Apr 6;11(4):810. doi: 10.3390/vaccines11040810 (PMC10145704; doi:10.3390/vaccines11040810)
Supplement: Supplementary file 1 [file vaccines-11-00810-s001.zip]

Archive with 4 entries (4 files):
- Supplementary S1.pdf
- Supplementary S2.pdf
- Supplementary S3_EN.pdf
- Supplementary S3_JP.pdf
